# Supplementary material for: Bifunctional polyacrylamide based polymers for the specific binding of hexahistidine tagged proteins on gold surfaces
Source: Royal Society of Chemistry journal article supplement (doi:10.1039/b920713a), 2009-12-05
Supplement: b920713a.pdf [file b920713a.pdf]

## Supplemental Information

### Determination of molecular weight by static light scattering

Static light scattering (SLS) experiments were performed with a 10 W Lexel Model 95 argon ion laser at a wavelength of 514.5 nm and at a power of 150-1000 mW. A Brookhaven Instruments BI-200 goniometer was used to measure the scattered light intensity at scattering angles from 50° to 130° in 10° increments. Fully hydrolyzed prepolymer samples were prepared at concentrations of 13, 16, 22, and 25 mg/mL in 18 M $\Omega$  deionized water and filtered through a 0.22  $\mu$ m cellulose filter into Fisherbrand 10 mm o.d. glass tubes prior to the experiment. The temperature of the sample was maintained at a constant value ( $\pm$  0.2 °C) by recirculating water from a temperature-controlled water bath through the sample holder. The weight-average molecular weight ( $M_w$ ) extracted from Zimm plots was determined to be  $\sim$ 49,000 g/mol.

### Kinetics of prepolymer reactions with NTA and MTP

The kinetics of the amidation reactions of the NTA and MTP functional groups with the prepolymer were determined using UV-vis spectroscopy to follow the free NHS chromophore concentration at 260 nm. The typical assay procedure was to dissolve 50 mg of the prepolymer in 4 ml of deionized water and then add 50  $\mu$ L of this solution to 3 ml of primary amine (0.01 M, pH 10.8), or 3 mL of PBS (0.1 M, pH 10.8), and then record absorbance values. The absorbance values were normalized to an experimentally determined linear calibration curve of NHS absorbance with a molar absorptivity of 8900  $\text{cm}^{-1}\text{M}^{-1}$ . The aminolysis rates were calculated to be  $9.63 \times 10^{-3}$  for MTP and  $9.65 \times 10^{-3}$  for NTA assuming pseudo first order kinetics compared to  $8.7 \times 10^{-7}$  for the hydrolysis reaction.

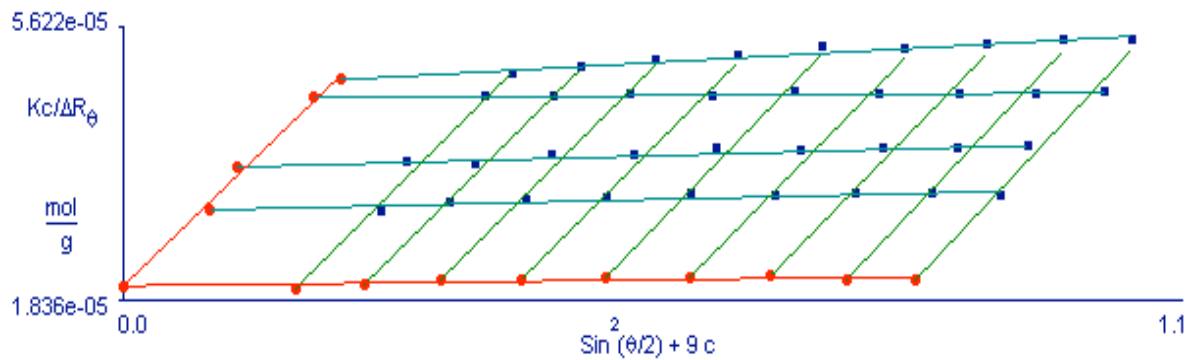

Figure S1: Zimm plot from static light scattering experiment to determine the molecular weight of the fully hydrolyzed Polyacrylamide-co-n-acryloxysuccinimide. The results of this experiment gave an average molecular mass of 49,000 g/mol for the hydrolyzed polymer.

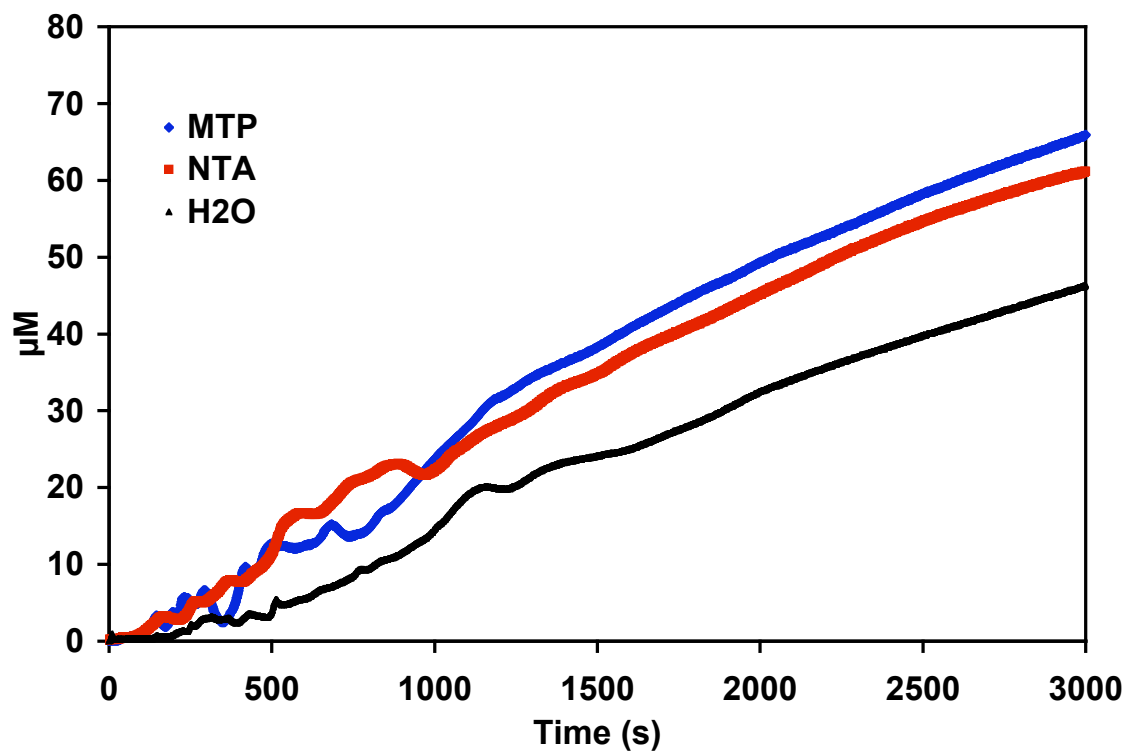

Figure S2: Kinetics of primary amines MTP (blue) and NTA (red) reacting with the polyacrylamide-co-n-acryloxysuccinimide active ester prepolymer followed by the increasing absorption of free succinimide at 260 nm.
